# Supplementary material for: Body Mass Index and Risk of Breast Cancer: A Nonlinear Dose-Response Meta-Analysis of Prospective Studies
Source: PubMed Central journal article supplement — Sci Rep. 2014 Dec 15;4:7480. doi: 10.1038/srep07480 (PMC4265780; doi:10.1038/srep07480), 2014-12-15
Supplement: srep07480-s1.pdf [file srep07480-s1.pdf]

# Body Mass Index and Risk of Breast Cancer: A Nonlinear Dose-Response Meta-Analysis of Prospective Studies

Xiaoping Xia <sup>1#</sup>, Wei Chen <sup>2#</sup>, Jiaoyuan Li <sup>2</sup>, Xueqin Chen <sup>2</sup>, Rui Rui <sup>2</sup>, Cheng Liu <sup>2</sup>, Yu Sun <sup>2</sup>, Li Liu <sup>4</sup>, Jing Gong <sup>2\*</sup>, Peng Yuan <sup>3\*</sup>

Wei Chen and Xiaoping Xia contributed equally to this work

<sup>1</sup> Clinical Laboratory of the Fourth Affiliated Hospital, Zhejiang University, School of Medicine, Hangzhou 310029, Zhejiang Province, China

<sup>2</sup> State Key Laboratory of Environment Health ( Incubation), MOE ( Ministry of Education ) Key Laboratory of Environment & Health, Ministry of Environmental Protection Key Laboratory of Environment and Health (Wuhan), and Department of Epidemiology and Biostatistics, School of Public Health, Tongji Medical College, Huazhong University of Science and Technology, Wuhan, China

<sup>3</sup> Department of Medical Oncology, Cancer Institute and Hospital, Chinese Academy of Medical Science and Peking Union Medical College, Beijing, China

<sup>4</sup>Guangdong Key Lab of Molecular Epidemiology and Department of Epidemiology and Biostatistics, School of Public Health, Guangdong Pharmaceutical University, Guangzhou, China

Supplementary figure captions

Figure S1. Flow diagram of the study selection procedure

Figure S2. The funnel plot of the dose-response meta-analysis of BMI and BC risk in postmenopausal women. No publication bias was observed in the meta-analysis (The vertical lines indicate 95 % confidence intervals).

Figure S3. The nonlinear dose-response meta-analysis of BMI and BC risk in White women of the postmenopausal group. Significant non-linear dose-response association between BMI and BC risk was identified in White postmenopausal women (The vertical lines indicate 95 % confidence intervals).

Table S1 The overall nonlinear dose-response meta-analysis of BMI and BC risk in postmenopausal women.

| BMI | RR (95% CI) <sup>a</sup> |
|-----|--------------------------|
| 18  | 0.99 (0.94-1.03)         |
| 19  | 0.99 (0.96-1.02)         |
| 20  | 0.99 (0.97-1.02)         |
| 21  | 1.00 (0.99-1.01)         |
| 22  | 1.00 (1.00-1.00)         |
| 23  | 1.01 (0.99-1.02)         |
| 24  | 1.01 (0.99-1.04)         |
| 25  | 1.02 (0.98-1.06)         |
| 26  | 1.03 (0.98-1.09)         |
| 27  | 1.05 (0.98-1.12)         |
| 28  | 1.07 (0.99-1.15)         |
| 29  | 1.09 (1.00-1.19)         |
| 30  | 1.12 (1.01-1.24)         |
| 31  | 1.14 (1.02-1.28)         |
| 32  | 1.17 (1.03-1.33)         |
| 33  | 1.20 (1.04-1.39)         |
| 34  | 1.23 (1.06-1.44)         |
| 35  | 1.26 (1.07-1.50)         |
| 36  | 1.30 (1.08-1.56)         |
| 37  | 1.33 (1.09-1.62)         |
| 38  | 1.36 (1.10-1.69)         |

a: reference was mean level of normal BMI (21.75)

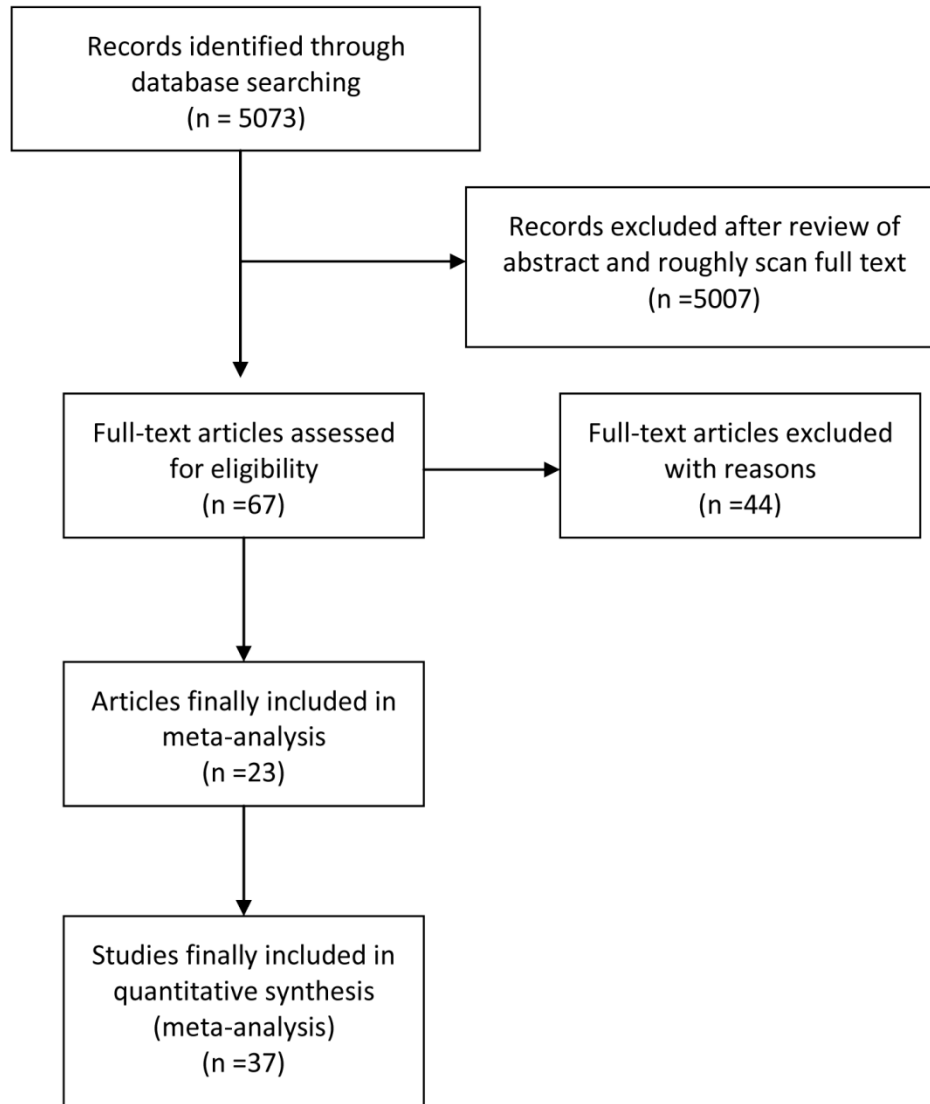

Figure S1-Yuan

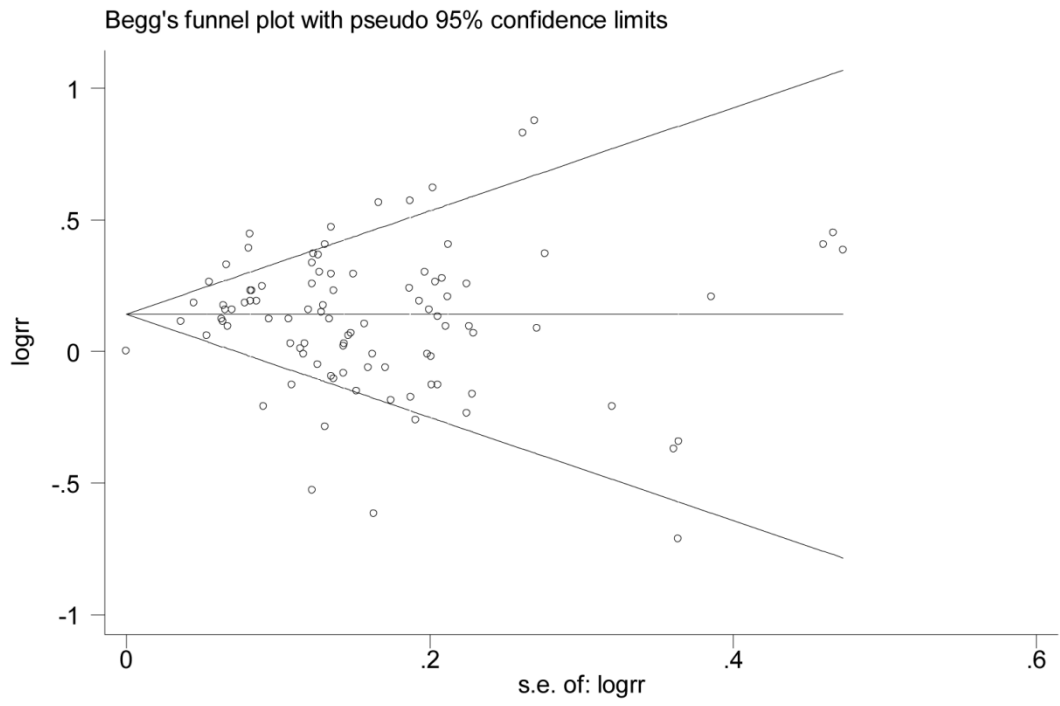

Figure S2-Yuan

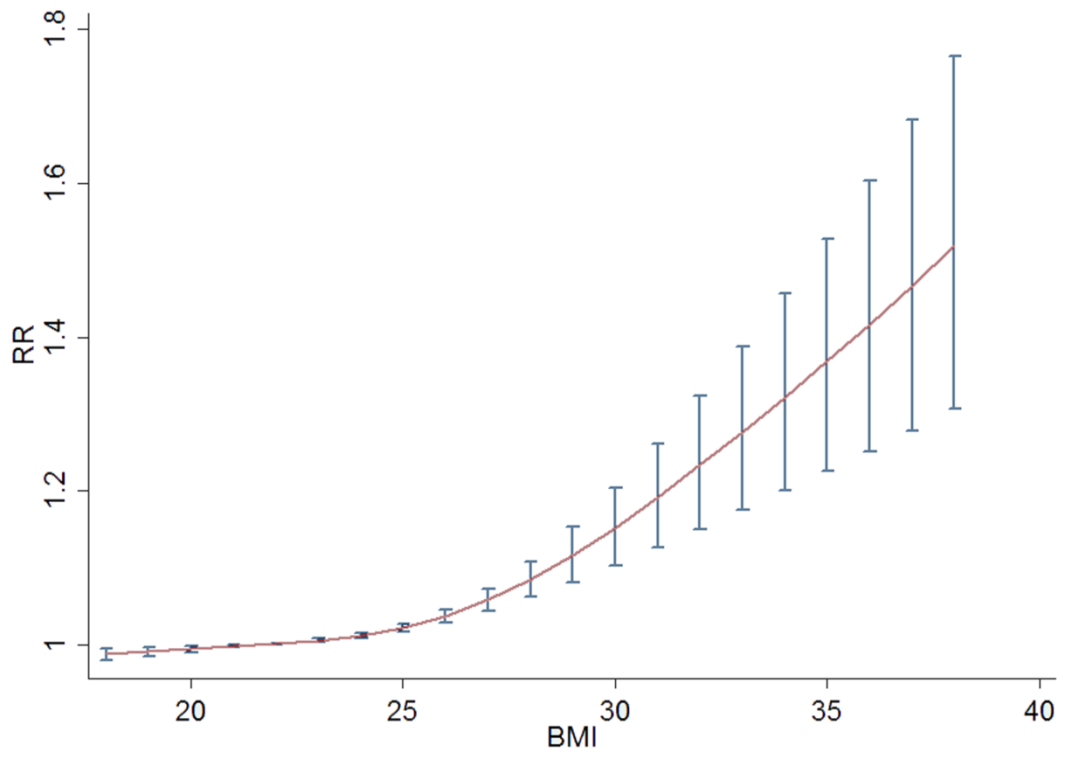

Figure S3-Yuan
